# Supplementary material
Source: PubMed Central journal article supplement (PMC8495491)

## Supplementary figure 1

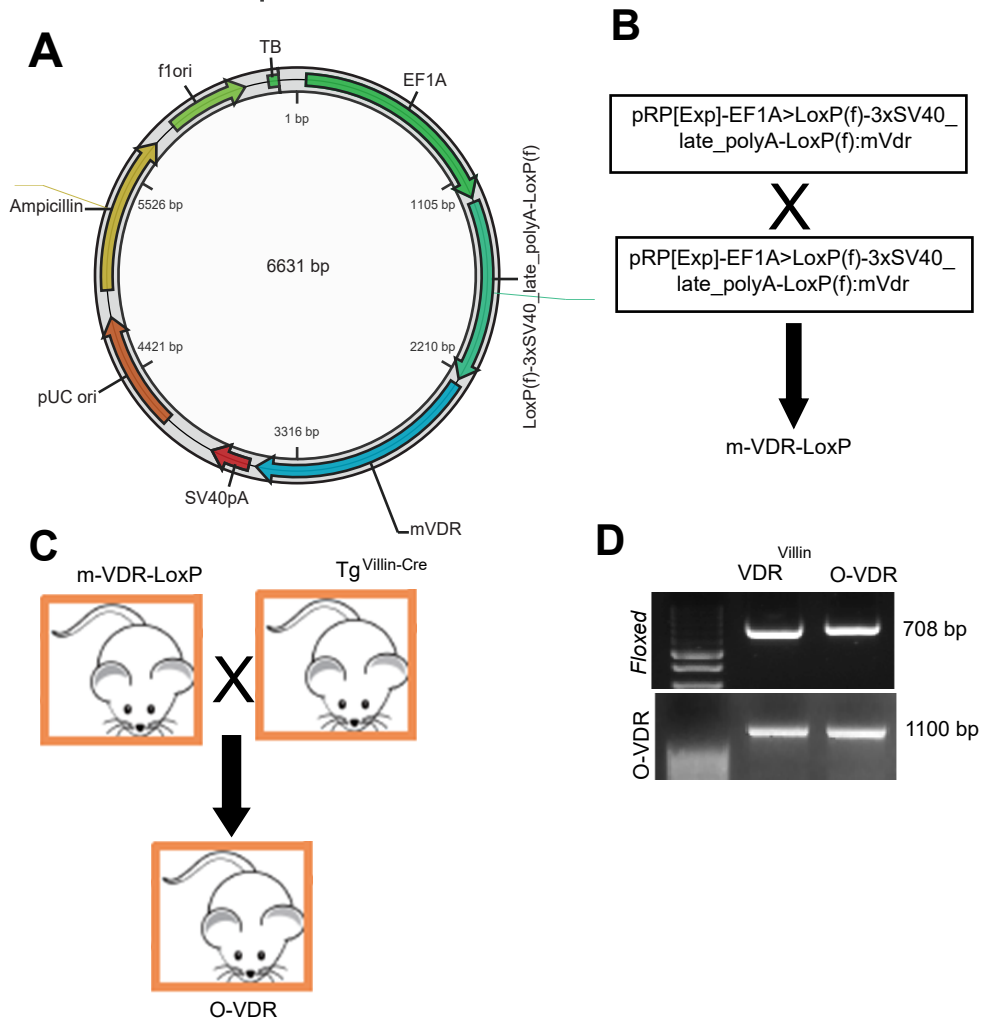

Supplement: jjab044_suppl_supplementary_figure_1.pdf [file jjab044_suppl_supplementary_figure_1.pdf]
